# Supplementary material for: DeLUCS: Deep learning for unsupervised clustering of DNA sequences
Source: PubMed Central journal article supplement (PMC8782307; doi:10.1371/journal.pone.0261531), 2022-01-21
Supplement: pone.0261531.s001.pdf [file pone.0261531.s001.pdf]

# S1 Appendix

## Instructions for reproduction of the tests using DeLUCS

First, go to <https://github.com/millanp95/DeLUCS> and clone the repository. Then run the series of commands for each test.

### Test #1:

1. `python build_dp.py --data_path='../data/Vertebrata/Test Files'`
2. `python get_pairs.py --data_path='../data/Vertebrata/Test Files/train.p' --k=6 --modify='mutation' --output='../data/Vertebrata/Test Files/testing_data.p'`
3. `python EvaluateDeLUCS.py --data_dir='../data/Vertebrata/Test Files' --out_dir='../data/Vertebrata/Test Files'`

#### Comparison Models:

- `python EvaluateComparison.py --data_path='../data/Vertebrata/Test Files/testing_data.p' --method='Supervised' --k=6`
- `python EvaluateComparison.py --data_path='../data/Vertebrata/Test Files/train.p' --method='k-means++' --k=6`
- `python EvaluateComparison.py --data_path='../data/Vertebrata/Test Files/train.p' --method='GMM' --k=6 --k=6`

### Test #2:

1. `python build_dp.py --data_path='../data/Fish/Test Files/Actinopterygii'`
2. `python get_pairs.py --data_path='../data/Fish/Test Files/Actinopterygii/train.p' --k=6 --n_mimics=8 --modify='mutation' --output='../data/Fish/Test Files/Actinopterygii/testing_data.p'`
3. `python EvaluateDeLUCS.py --data_dir='../data/Fish/Test Files/Actinopterygii' --out_dir='../data/Fish/Test Files/Actinopterygii'`

#### Comparison Models:

- `python EvaluateComparison.py --data_path='../data/Fish/Test Files/Actinopterygii/testing_data.p' --method='Supervised' --k=6`
- `python EvaluateComparison.py --data_path='../data/Fish/Test Files/Actinopterygii/train.p' --method='k-means++' --k=6`
- `python EvaluateComparison.py --data_path='../data/Fish/Test Files/Actinopterygii/train.p' --method='GMM' --k=6`

### Test #3:

1. `python build_dp.py --data_path='../data/Fish/Test Files/Neopterygii'`
2. `python get_pairs.py --data_path='../data/Fish/Test Files/Neopterygii/train.p' --k=6 --modify='mutation' --output='../data/Fish/Test Files/Neopterygii/testing_data.p'`
3. `python EvaluateDeLUCS.py --data_dir='../data/Fish/Test Files/Neopterygii' --out_dir='../data/Fish/Test Files/Neopterygii'`

#### Comparison Models:

- `python EvaluateComparison.py --data_path='../data/Fish/Test Files/Neopterygii/testing_data.p' --method='Supervised' --k =6`
- `python EvaluateComparison.py --data_path='../data/Fish/Test Files/Neopterygii/train.p' --method='k-means++' --k=6`
- `python EvaluateComparison.py --data_path='../data/Fish/Test Files/Neopterygii/train.p' --method='GMM' --k=6`

### Test #4:

1. `python build_dp.py --data_path='../data/Fish/Test Files/Ostariophysi'`
2. `python get_pairs.py --data_path='../data/Fish/Test Files/Ostariophysi/train.p' --k=6 --n_mimics=8 --modify='mutation' --output='../data/Fish/Test Files/Ostariophysi/testing_data.p'`
3. `python EvaluateDeLUCS.py --data_dir='../data/Fish/Test Files/Ostariophysi' --out_dir='../data/Fish/Test Files/Ostariophysi'`

#### Comparison Models:

- `python EvaluateComparison.py --data_path='../data/Fish/Test Files/Ostariophysi/testing_data.p' --method='Supervised' --k =6`
- `python EvaluateComparison.py --data_path='../data/Fish/Test Files/Ostariophysi/train.p' --method='k-means++' --k=6`
- `python EvaluateComparison.py --data_path='../data/Fish/Test Files/Ostariophysi/train.p' --method='GMM' --k=6`

### Test #5:

1. `python build_dp.py --data_path='../data/Fish/Test Files/Cypriniformes'`
2. `python get_pairs.py --data_path='../data/Fish/Test Files/Cypriniformes/train.p' --k=6 --n_mimics=8 --modify='mutation' --output='../data/Fish/Test Files/Cypriniformes/testing_data.p'`
3. `python EvaluateDeLUCS.py --data_dir='../data/Fish/Test Files/Cypriniformes' --out_dir='../data/Fish/Test Files/Cypriniformes'`

#### Comparison Models:

- `python EvaluateComparison.py --data_path='../data/Fish/Test Files/Cypriniformes/testing_data.p' --method='Supervised' --k =6`
- `python EvaluateComparison.py --data_path='../data/Fish/Test Files/Cypriniformes/train.p' --method='k-means++' --k=6`
- `python EvaluateComparison.py --data_path='../data/Fish/Test Files/Cypriniformes/train.p' --method='GMM' --k=6`

## Test #6:

1. `python build_dp.py --data_path='../data/Fish/Test Files/Cyprinidae'`
2. `python get_pairs.py --data_path='../data/Fish/Test Files/Cyprinidae/train.p'`  
`--k=6 --n_mimics=8 --modify='mutation' --output='../data/Fish/Test`  
`Files/Cyprinidae/testing_data.p'`
3. `python EvaluateDeLUCS.py --data_dir='../data/Fish/Test Files/Cyprinidae' --`  
`out_dir='../data/Fish/Test Files/Cyprinidae'`

### Comparison Models:

- `python EvaluateComparison.py --data_path='../data/Fish/Test`  
`Files/Cyprinidae/testing_data.p' --method='Supervised' --k =6`
- `python EvaluateComparison.py --data_path='../data/Fish/Test`  
`Files/Cyprinidae/train.p' --method='k-means++' --k=6`
- `python EvaluateComparison.py --data_path='../data/Fish/Test`  
`Files/Cyprinidae/train.p' --method='GMM' --k=6`

## Test #7:

1. `python build_dp.py --data_path='../data/Bacteria/Test_Files'`
2. `python get_pairs.py --data_path='../data/Bacteria/Test_Files/train.p' --k=6`  
`--modify='mutation' --output='../data/Bacteria/Test_Files/testing_data.p'`
3. `python EvaluateDeLUCS.py --data_dir='../data/Bacteria/Test_Files' --`  
`out_dir='../data/Bacteria/Test Files'`

### Comparison Models:

- `python EvaluateComparison.py`  
`--data_path='../data/Bacteria/Test_Files/testing_data.p' --`  
`method='Supervised' --k =6`
- `python EvaluateComparison.py`  
`--data_path='../data/Bacteria/Test_Files/train.p' --method='k-means++' --k=6`
- `python EvaluateComparison.py`  
`--data_path='../data/Bacteria/Test_Files/train.p' --method='GMM' --k=6`

## Test #8:

1. `python build_dp.py --data_path='../data/Bacteria/Proteo_Test_Files'`
2. `python get_pairs.py --data_path='../data/Bacteria/Proteo_Test_Files/train.p'`  
`--k=6 --modify='mutation'`  
`--output='../data/Bacteria/Proteo_Test_Files/testing_data.p'`
3. `python EvaluateDeLUCS.py --data_dir='../data/Bacteria/Proteo_Test_Files' --`  
`out_dir='../data/ProteoBacteria/Test Files'`

### Comparison Models:

- `python EvaluateComparison.py --data_path='../data/Bacteria/Proteo_Test`  
`_Files/testing_data.p' --method='Supervised' --k =6`
- `python EvaluateComparison.py --data_path='../data/Bacteria/Proteo_Test`  
`Files/train.p' --method='k-means++' --k=6`
- `python EvaluateComparison.py`  
`--data_path='../data/Bacteria/Proteo_Test_Files/train.p' --method='GMM' --`  
`k=6`

### **Test #9:**

1. `python build_dp.py --data_path='../data/Influenza-A/Test Files'`
2. `python get_pairs.py --data_path='../data/Influenza-A/Test Files/train.p' --k=6 --modify='mutation' --output='../data/Influenza-A/Test Files/testing_data.p'`
3. `python EvaluateDeLUCS.py --data_dir='../data/Influenza-A/Test Files' --out_dir='../data/Influenza-A/Test Files'`

#### Comparison Models:

- `python EvaluateComparison.py --data_path='../data/Influenza-A/Test Files/testing_data.p' --method='Supervised' --k =6`
- `python EvaluateComparison.py --data_path='../data/Influenza-A/Test Files/train.p' --method='k-means++' --k=6`
- `python EvaluateComparison.py --data_path='../data/Influenza-A/Test Files/train.p' --method='GMM' --k=6`

### **Test #10:**

1. `python build_dp.py --data_path='../data/Dengue/Test Files'`
2. `python get_pairs.py --data_path='../data/Dengue/Test Files/train.p' --k=6 --modify='mutation' --output='../data/Dengue/Test Files/testing_data.p'`
3. `python EvaluateDeLUCS.py --data_dir='../data/Dengue/Test Files' --out_dir='../data/Dengue/Test Files'`

#### Comparison Models:

- `python EvaluateComparison.py --data_path='../data/Dengue/Test Files/testing_data.p' --method='Supervised' --k =6`
- `python EvaluateComparison.py --data_path='../data/Dengue/Test Files/train.p' --method='k-means++' --k=6`
- `python EvaluateComparison.py --data_path='../data/Dengue/Test Files/train.p' --method='GMM' --k=6`

### **Test #11:**

1. `python build_dp.py --data_path='../data/HBV/Test Files'`
2. `python get_pairs.py --data_path='../data/HBV/Test Files/train.p' --k=6 --modify='mutation' --output='../data/HBV/Test Files/testing_data.p'`
3. `python EvaluateDeLUCS.py --data_dir='../data/HBV/Test Files' --out_dir='../data/HBV/Test Files'`

#### Comparison Models:

1. `python EvaluateComparison.py --data_path='../data/HBV/Test Files/testing_data.p' --method='Supervised' --k =6`
2. `python EvaluateComparison.py --data_path='../data/HBV/Test Files/train.p' --method='k-means++' --k=6`
3. `python EvaluateComparison.py --data_path='../data/HBV/Test Files/train.p' --method='GMM' --k=6`

## DeLUCS computational pipeline for running your own dataset:

### 1. Build the dataset:

```
python build_dp.py --data_path=<PATH_sequence_folder>
```

- Input: Folders with the sequences in FASTA format
- Output : file in the form (label,sequence,accession)

If the true label is unknown then place ALL the sequences in the same folder

### 2. Compute the mimics.

```
python get_pairs.py --data_path=<PATH_dataset> --k=6 --modify='mutation' --  
output=<PATH_output_file>
```

- Input: file in the form (label, sequence, accession)
- Output : file in the form of (pairs, x\_test, y\_test).

### 3. Train the model.

If the true labels are unknown for your dataset and you want to use DeLUCS as a clustering tool without the assessment by means of the Hungarian algorithm, run:

```
python TrainDeLUCS.py --data_dir=<PATH_of_computed_mimics> --out_dir=<OUTPURDIR> --  
n_clusters=<expected_number_of_clusters>
```

- Input: file in the form of (pairs, x\_test).
- Output : Cluster assignment for each sequence in x\_test.

If the “ground truth” is known for your dataset and you want to train DeLUCS and then evaluate its performance by means of the Hungarian algorithm, run:

```
python EvaluateDeLUCS.py --data_dir=<PATH_computed_mimics> --out_dir=<OUTPURDIR>
```

- Input: file in the form of (pairs, x\_test, y\_test).
- Output : Image with the confusion matrix.
