# Supplementary material for: DeLUCS: Deep learning for unsupervised clustering of DNA sequences
Source: PubMed Central journal article supplement (PMC8782307; doi:10.1371/journal.pone.0261531), 2022-01-21
Supplement: pone.0261531.s002.pdf [file pone.0261531.s002.pdf]

## S2 Appendix

### Query options for data download

#### **Mitochondrial dataset (Nov 16, 2020) :**

We used the software Geneious and the following keywords: *Mitochondrion*, *Mitochondria*, *Vertebrata* and *Complete Genome*.

#### **Bacterial dataset (Jan 18, 2021):**

We downloaded the file `bac120_taxonomy_r95.tsv` directly from GTDB <https://data.gtdb.ecogenomic.org/releases/release95/95.0/> and filtered the families from the complete taxonomy.

#### **Influenza A virus dataset (Oct 14, 2020):**

The sequences were downloaded directly from:

<https://www.ncbi.nlm.nih.gov/genomes/FLU/dataset/nph-select.cgi#mainform>, using the following query options:

- sequence type: Nucleotide
- type: A
- subtypes: H1N1,H2N2, H5N1, H7N3, and H7N9
- segment: 6(NA)
- other options: default
- full length only
- collapse identical

-----Dataset Statistics -----

Total num of classes: 5

Total num of sequences: 13078

Min genome length: 52

Avg genome length: 1392.2

Max genome length: 1544

Data distribution:

H5N1 => 3095

H2N2 => 175

H1N1 => 9189

H7N9 => 293

H7N3 => 326

### **Dengue virus dataset (Oct 14, 2020):**

The sequences were downloaded directly from:

<https://www.ncbi.nlm.nih.gov/genomes/VirusVariation/dataset/nph-select.cgi?taxid=12637>, using the following query options:

- sequence type: Nucleotide
- other options: default
- collapse identical
- full-length only

-----Dataset Statistics -----

Total num of classes: 5

Total num of samples: 5868

Min genome length: 10161

Avg genome length: 10582.002044989775

Max genome length: 11195

Data distribution:

|           |    |      |
|-----------|----|------|
| Subtype-1 | => | 2446 |
| Subtype-2 | => | 1891 |
| Subtype-3 | => | 1121 |
| Subtype-4 | => | 407  |
| N/A       | => | 3    |

### **Hepatitis B virus dataset (Oct 14, 2020):**

The whole dataset was downloaded directly from:

<https://hbvdb.lyon.inserm.fr/HBVdb/HBVdbDataset?seqtype=0>.

-----Dataset Statistics -----

Total num of classes: 6

Total num of samples: 6493

Min genome length: 3182

Avg genome length: 3209.943015555213

Max genome length: 3254

Data distribution:

|   |    |      |
|---|----|------|
| A | => | 880  |
| B | => | 1765 |
| C | => | 2194 |
| D | => | 1090 |
| E | => | 306  |
| F | => | 258  |

**Note:** The curated datasets used to obtain the results in the paper can be found at:

<https://github.com/millanp95/DeLUCS/tree/master/data>
