# Supplementary material for: DeLUCS: Deep learning for unsupervised clustering of DNA sequences
Source: PubMed Central journal article supplement (PMC8782307; doi:10.1371/journal.pone.0261531), 2022-01-21

## S3 Appendix

### Confusion matrices

**Figure 1 (Tests 1-6).** Confusion matrices of the assignment that maximizes the accuracy at each taxonomic level of the mtDNA dataset. Predicted labels are numeric cluster assignments, omitted here for readability.

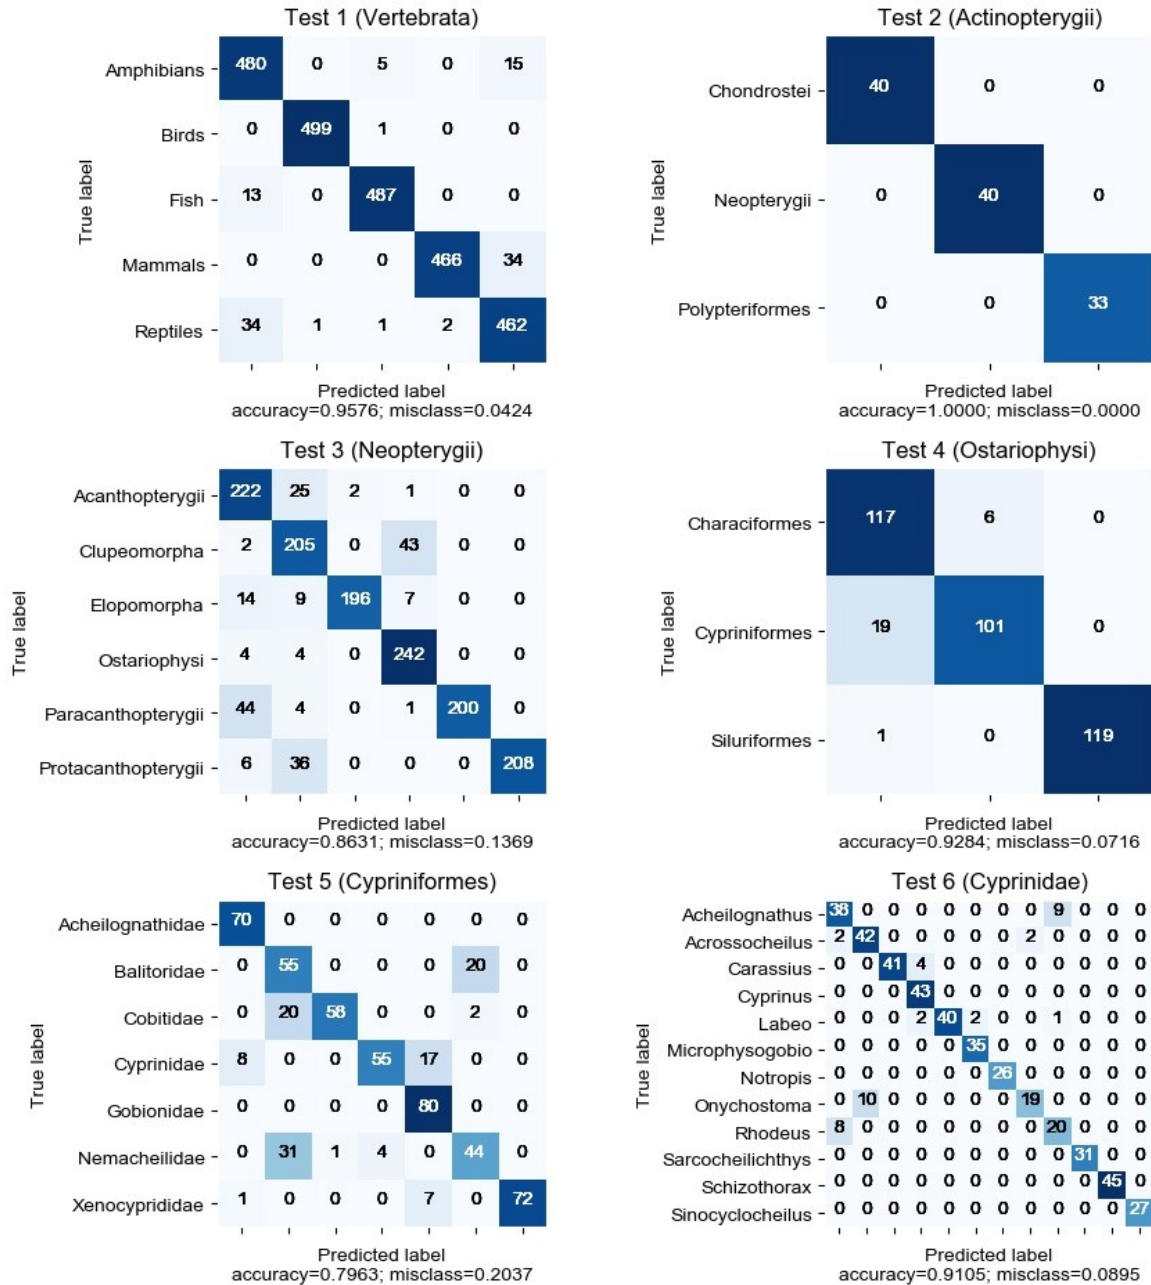

**Figure 2 (Tests 7, 8).** Confusion matrices of the assignment that maximizes the accuracy for both computational tests with the bacterial dataset at phylum level to families. (Top) All bacterial families

are considered. (Bottom) Only sequences in the phylum Proteobacteria are considered. Predicted labels are numeric cluster assignments, omitted here for readability.

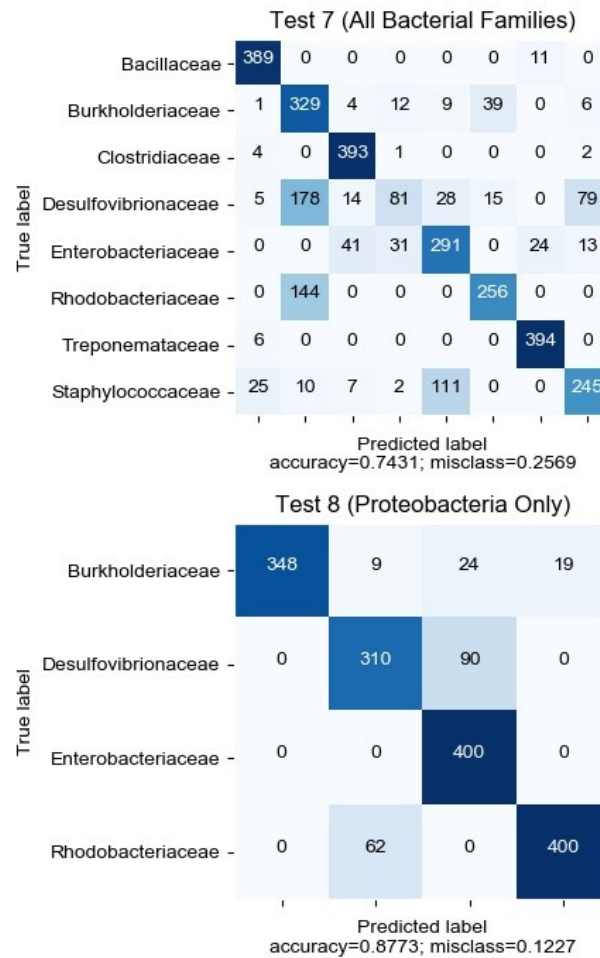

**Figure (Tests 9-11).** Confusion matrices of the assignment that maximizes the accuracy for the NA-encoding gene of the Influenza A virus, Dengue virus genomes, and HBV genomes. Predicted labels are numeric cluster assignments, omitted here for readability.

Test 9 (Influenza A)

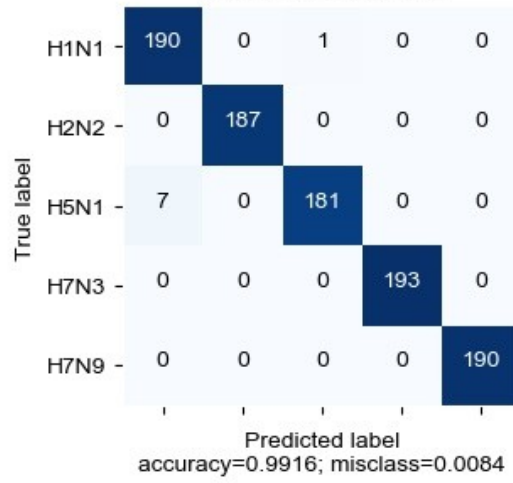

Test 10 (Dengue)

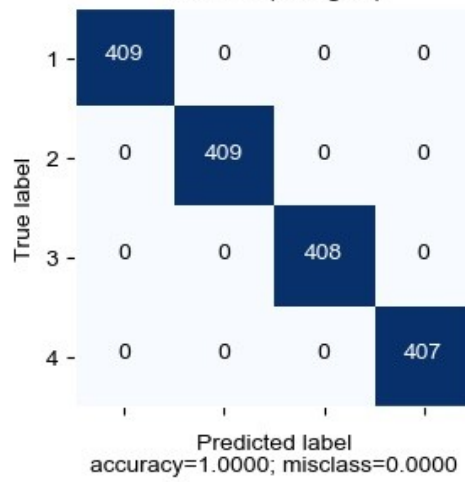

Test 11 (HBV)

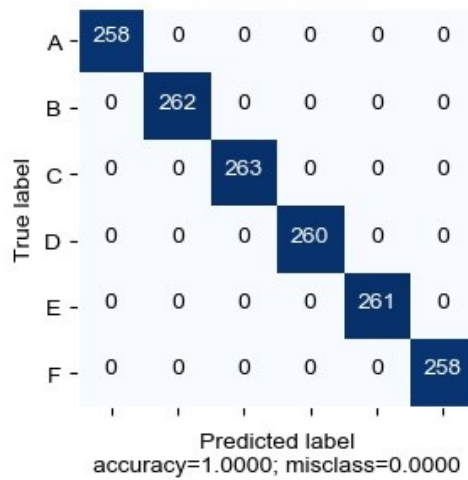

Supplement: pone.0261531.s003.pdf [file pone.0261531.s003.pdf]
